# Supplementary material for: Aggregation induced enhanced and exclusively highly Stokes shifted emission from an excited state intramolecular proton transfer exhibiting molecule
Source: Royal Society of Chemistry journal article supplement (doi:10.1039/c6fd00171h), 2016-08-05
Supplement: c6fd00171h1.pdf [file c6fd00171h1.pdf]

**Aggregation Induced Enhanced and Exclusive Highly Stoke Shifted Emission from an  
Excited State Intramolecular Proton Transfer Exhibiting Molecule**

Santosh Kumar Behera,<sup>a</sup> Anwasha Murkherjee,<sup>a</sup> G. Sadhuragiri,<sup>b</sup> Palani Elumalai,<sup>b</sup> M.  
Sathiyendiran,<sup>b</sup> Manishekhar Kumar,<sup>c</sup> Biman B. Mandal,<sup>c</sup> and G. Krishnamoorthy<sup>a\*</sup>

<sup>a</sup>Department of Chemistry, Indian Institute of Technology Guwahati, Guwahati-781039.

<sup>b</sup>School of Chemistry, University of Hyderabad, Hyderabad, India

<sup>c</sup>Department of Biosciences and Bioengineering, Indian Institute of Technology Guwahati,  
Guwahati-781039.

**Supporting Information**

Email: [gkrishna@iitg.ernet.in](mailto:gkrishna@iitg.ernet.in), Telephone - (+) 91-3612582315. Fax - (+) 91-3612582349.

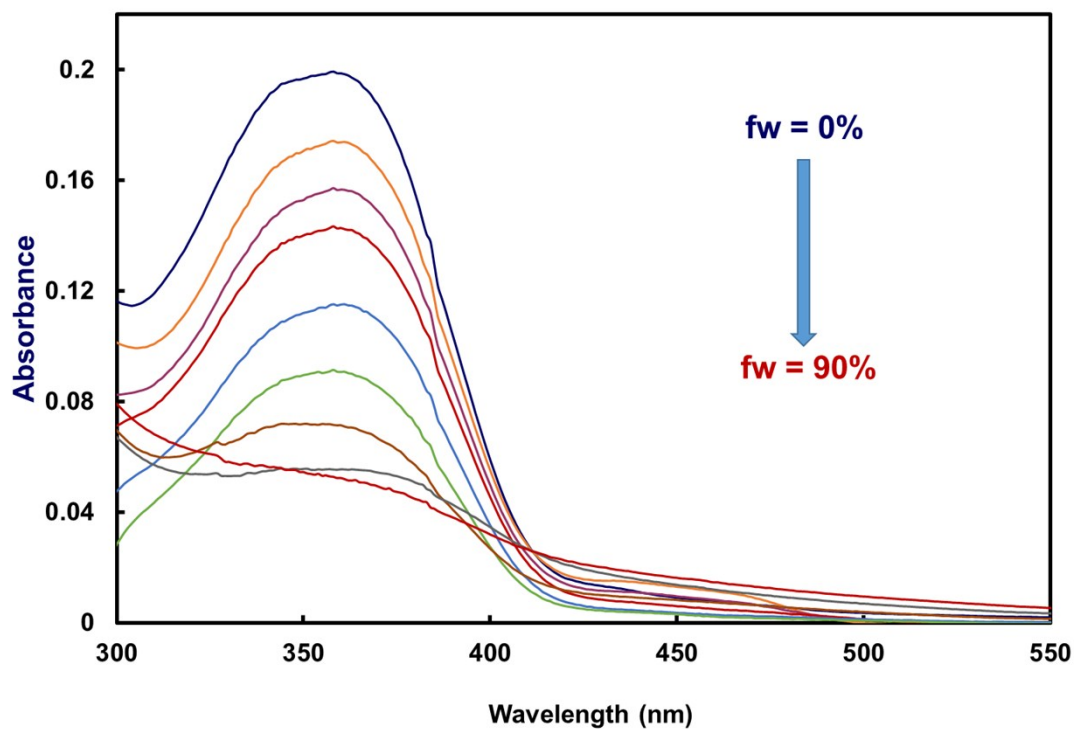

**Fig. S1.** The absorption spectra of bis-HPBO in different water fraction,  $\lambda_{\text{exc}} = 350$  nm.

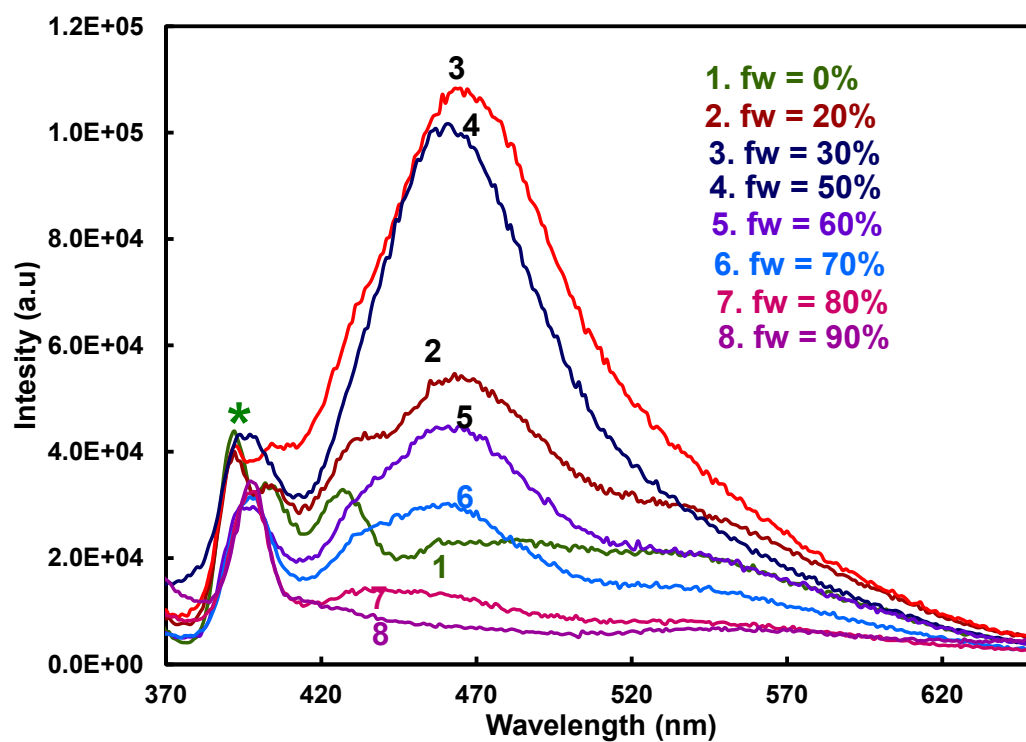

**Fig. S2.** The fluorescence spectra of bis-HPBO in different water fraction,  $\lambda_{\text{exc}} = 350$  nm (\* indicates the water Raman band)

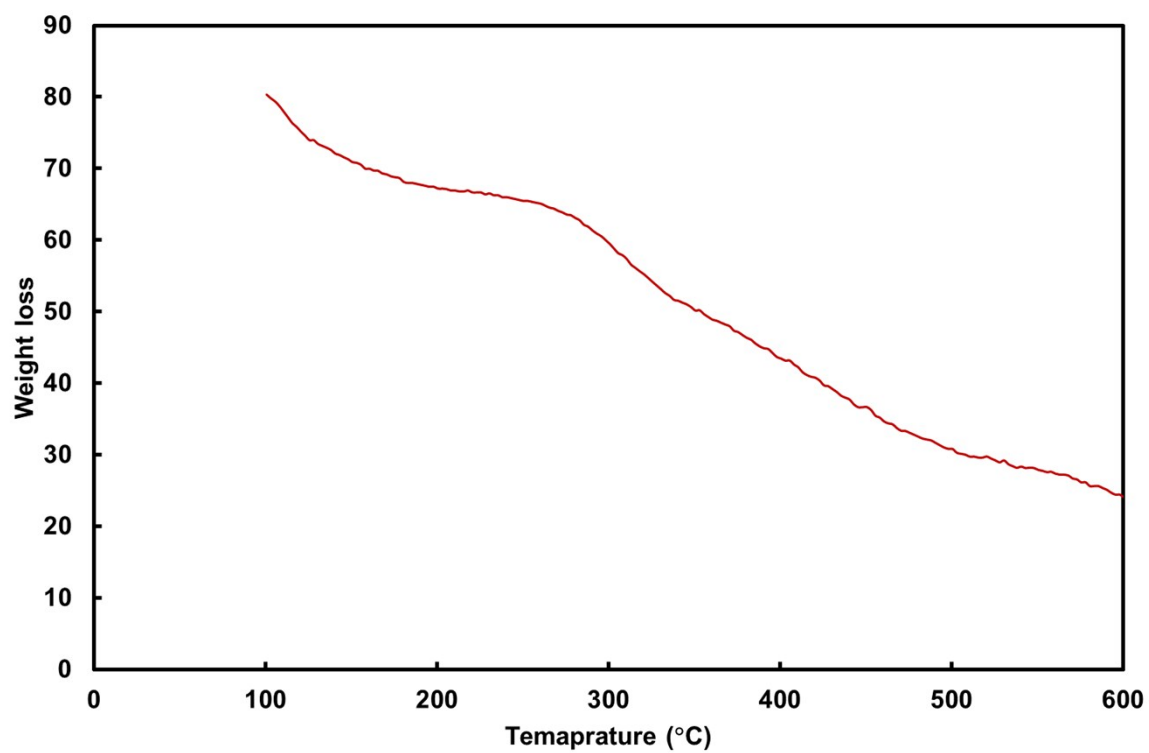

**Fig. S3.** TGA plot showing weight loss of bis-HPBO.
